# Supplementary material
Source: publisher figshare collection journal article supplement (https://acs.figshare.com/ndownloader/files/12833762)
Supplement: Supplementary file 1 [file 12833762]

# Supporting Information

## Renal-Clearable Ultra-Small Coordination Polymer Nanodots for Chelator-Free $^{64}\text{Cu}$ -Labeling and Imaging-Guided Enhanced Radiotherapy of Cancer

Sida Shen<sup>1</sup>, Dawei Jiang<sup>2,3</sup>, Liang Cheng<sup>1\*</sup>, Yu Chao<sup>1</sup>, Kaiqi Nie<sup>1</sup>, Ziliang Dong<sup>1</sup>, Christopher J. Kuttyreff<sup>2</sup>, Jonathan W. Engle<sup>2</sup>, Peng Huang<sup>3</sup>, Weibo Cai<sup>2\*</sup>, and Zhuang Liu<sup>1\*</sup>

<sup>1</sup>Institute of Functional Nano & Soft Materials (FUNSOM), Collaborative Innovation Center of Suzhou Nano Science and Technology, Soochow University, Suzhou, Jiangsu 215123, China

<sup>2</sup>Departments of Radiology and Medical Physics, University of Wisconsin-Madison, Wisconsin 53705, United States

<sup>3</sup>Guangdong Key Laboratory for Biomedical Measurements and Ultrasound Imaging, School of Biomedical Engineering, Health Science Center, Shenzhen University, Shenzhen 518060, China

Email: [lcheng2@suda.edu.cn](mailto:lcheng2@suda.edu.cn); [zliu@suda.edu.cn](mailto:zliu@suda.edu.cn); [wcai@uwhealth.org](mailto:wcai@uwhealth.org)

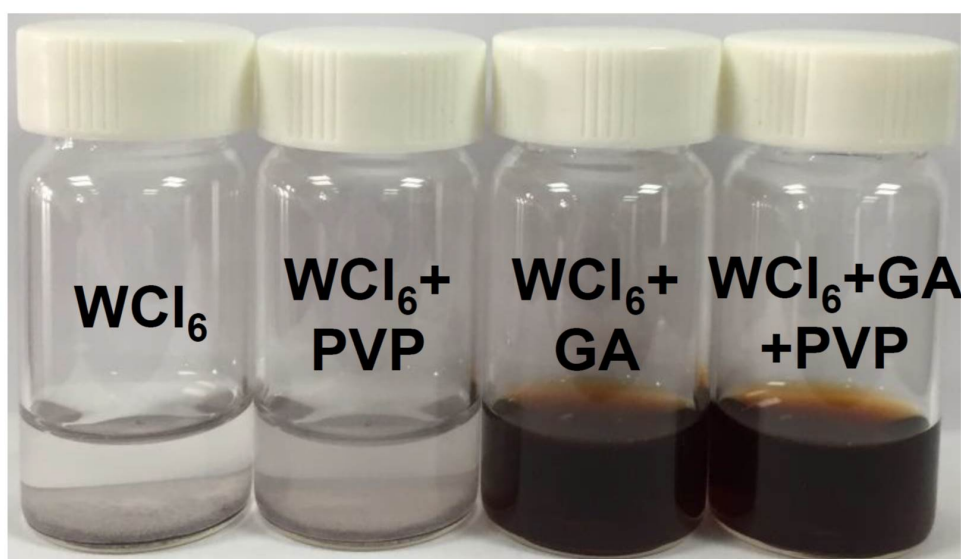

**Supporting Figure S1.** A Photograph of samples by mixing  $\text{WCl}_6$ ,  $\text{WCl}_6$ +PVP,  $\text{WCl}_6$ +GA, and  $\text{WCl}_6$ +GA+PVP in water under room temperature.

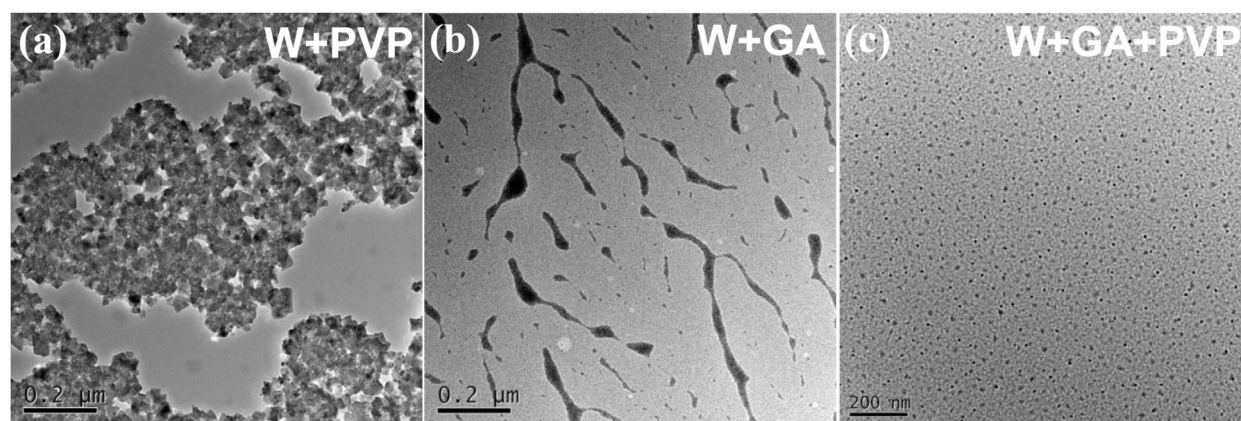

**Supporting Figure S2.** TEM images of samples by mixing (a)  $\text{WCl}_6$ +PVP, (b)  $\text{WCl}_6$ +GA, (c)  $\text{WCl}_6$ +GA+PVP.

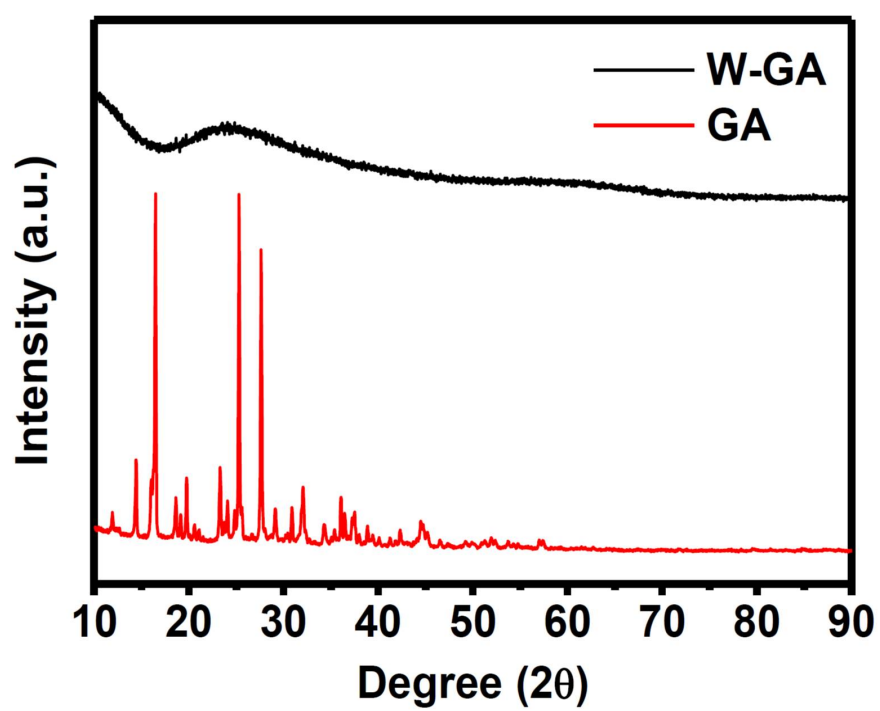

**Supporting Figure S3.** XRD spectra of GA and as-made W-GA CPNs.

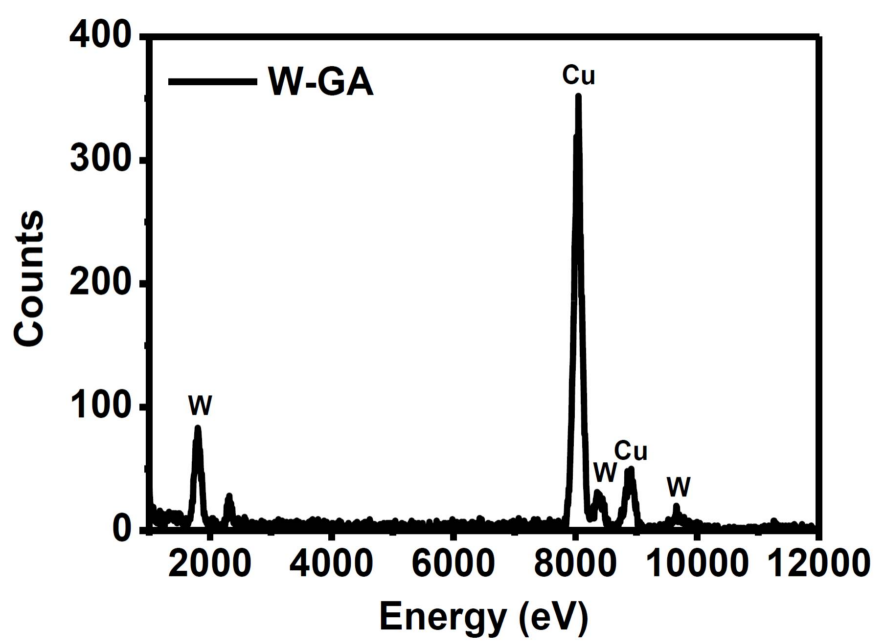

**Supporting Figure S4.** The EDX spectrum of the obtained W-GA CPNs.

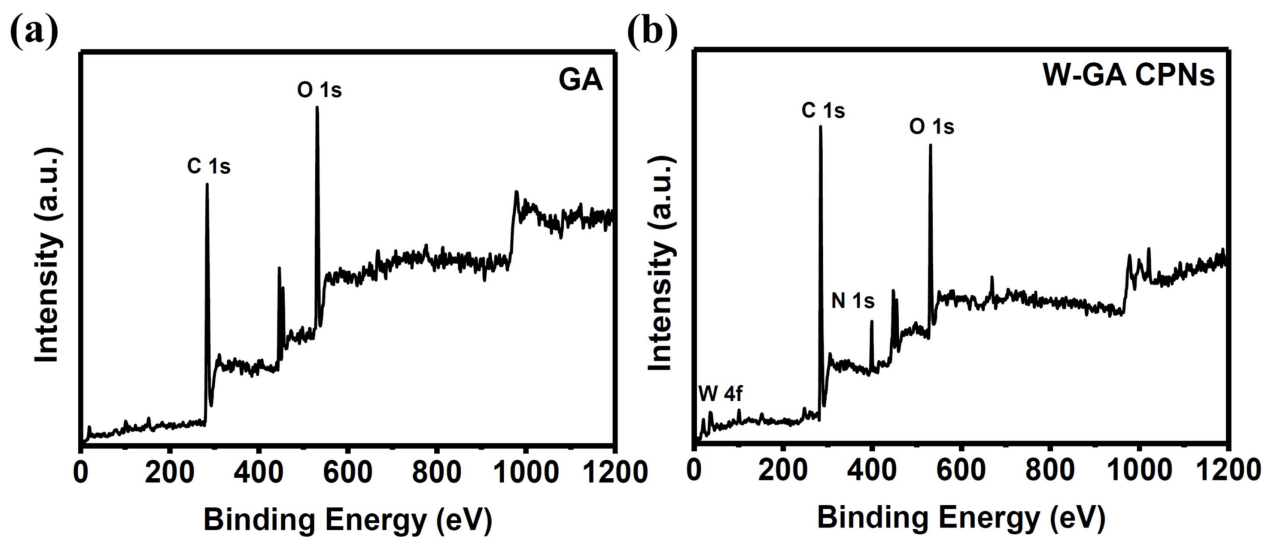

**Supporting Figure S5.** XPS spectra of (a) GA and (b) as-synthesized W-GA CPNs.

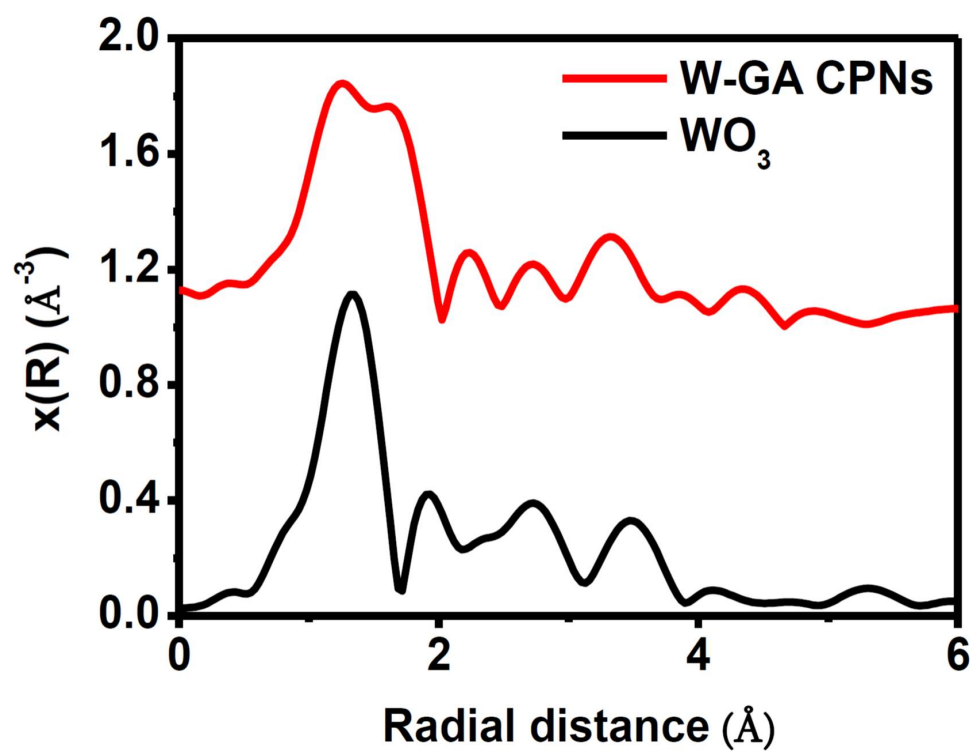

**Supporting Figure S6.** Fourier transform magnitude of  $k^3$ -weighted W  $L_3$ -edge extended X-ray absorption fine structure (EXAFS) spectra of the W-GA CPNs and  $\text{WO}_3$ .

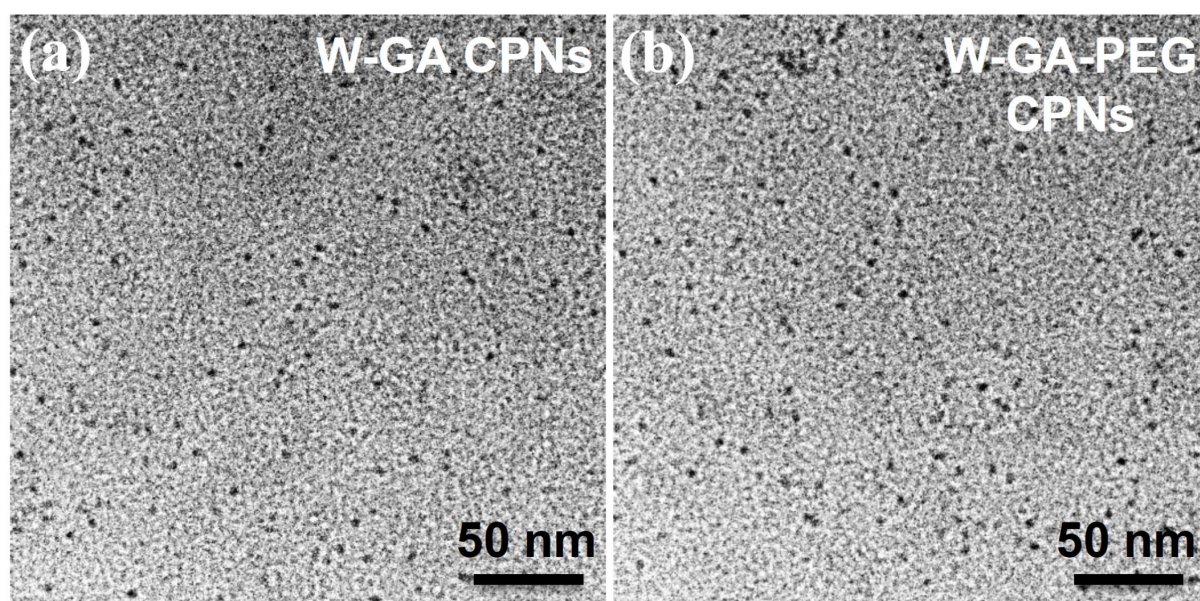

**Supporting Figure S7.** TEM images of W-GA CPNs (a) before and (b) after PEGylation.

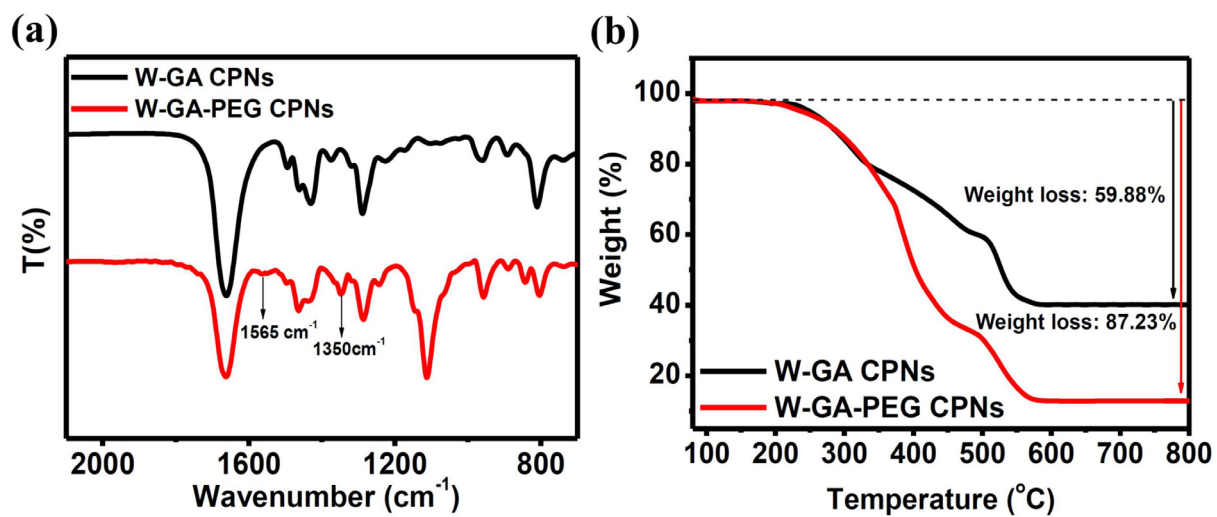

**Supporting Figure S8.** (a) FTIR spectra and (b) Thermogravimetric analysis (TGA) of as-synthesized W-GA CPNs before and after PEGylation.



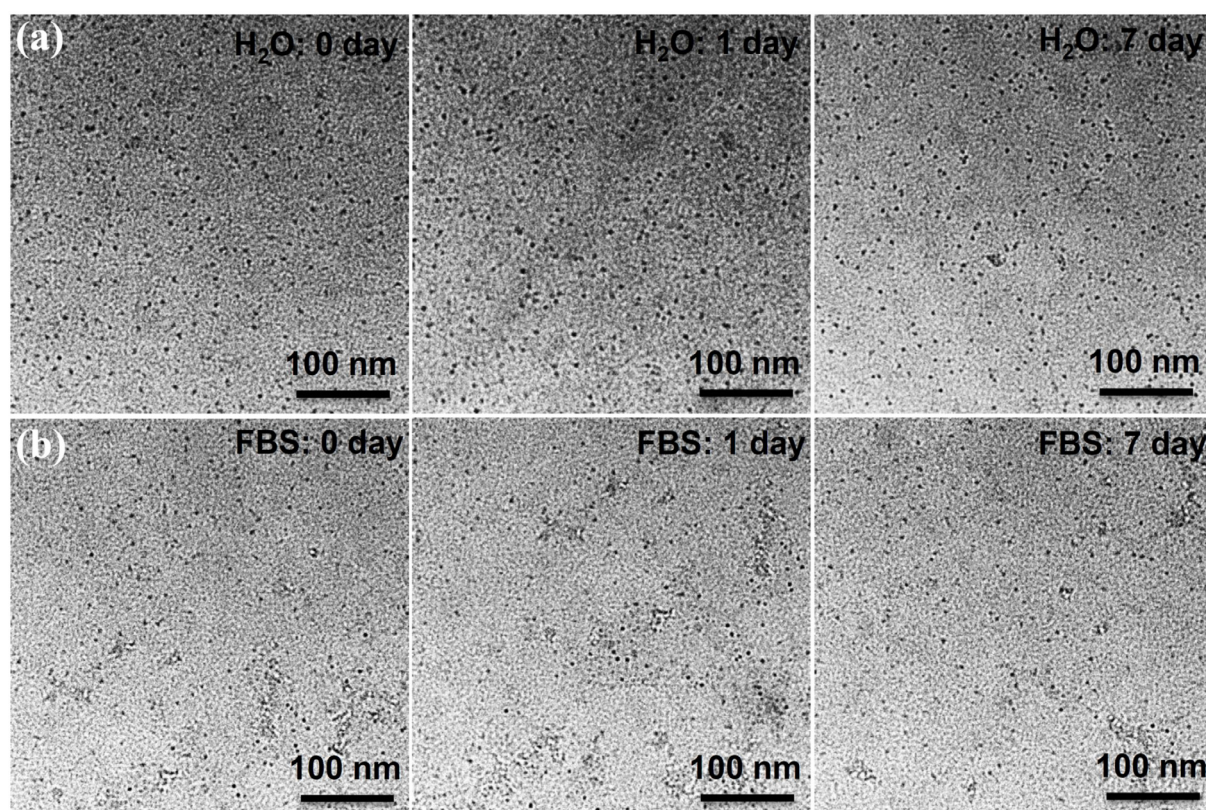

**Supporting Figure S9.** TEM images of PEGylated W-GA CPNs in water and FBS at various time points.

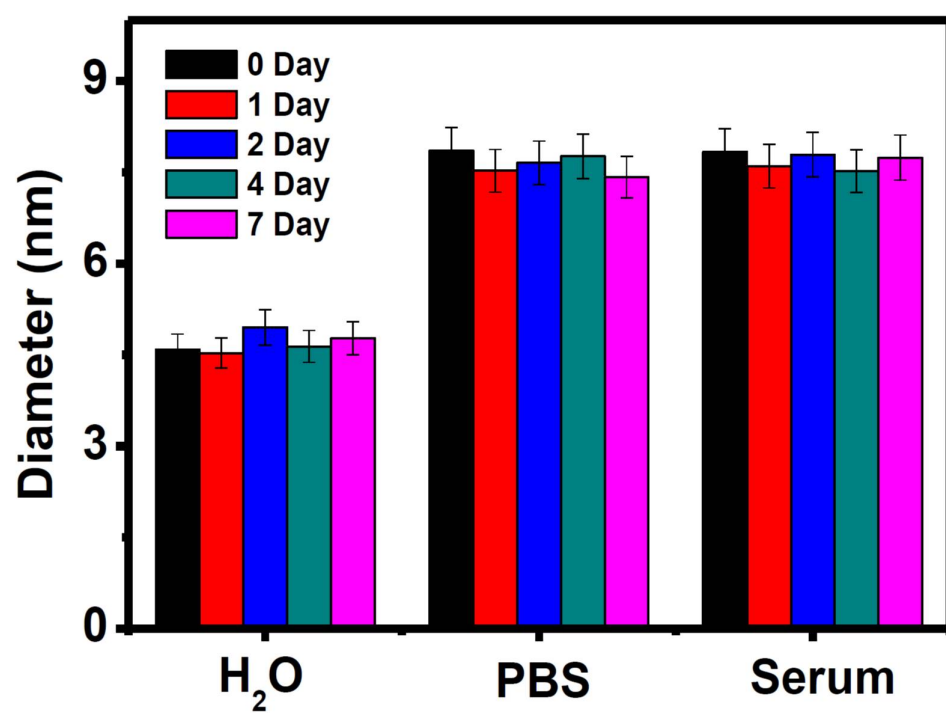

**Supporting Figure S10.** Stability test of PEGylated W-GA CPNs in water, PBS, and serum at various time points.

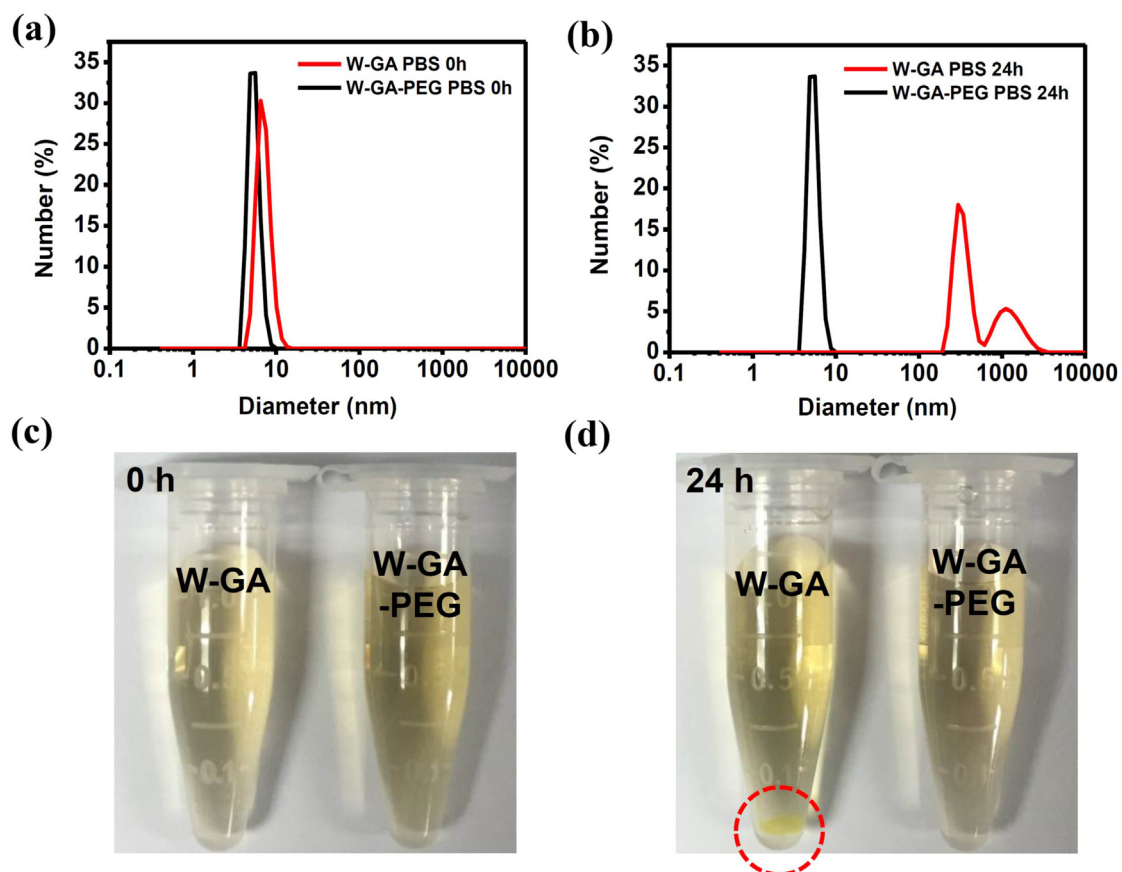

**Supporting Figure S11.** DLS-measured diameters of W-GA CPNs before and after PEGylation in PBS for 0 h (a) and 24 h (b). Photographs of W-GA CPNs and W-GA-PEG CPNs in PBS for 0 h (c) and 24 h (d).

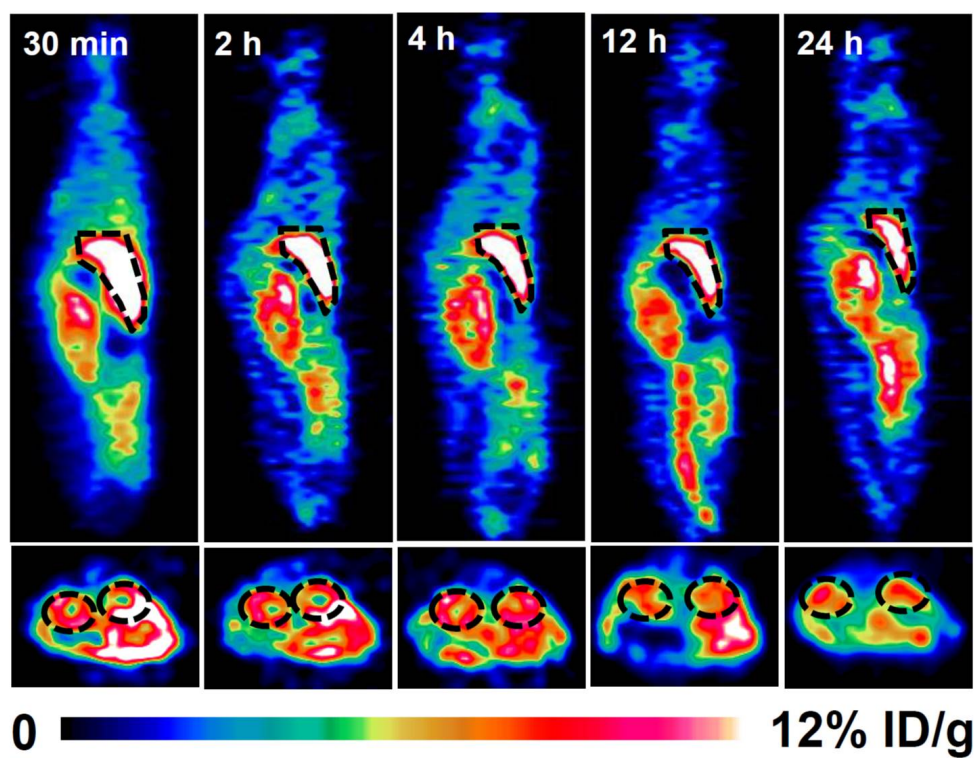

**Supporting Figure S12.** *In vivo* PET images of 4T1-tumor-bearing mice from different sections after *i.v.* injection of  $^{64}\text{Cu}$ -W-GA-PEG CPNs taken at different time points. The liver and kidneys are indicated with black circles.

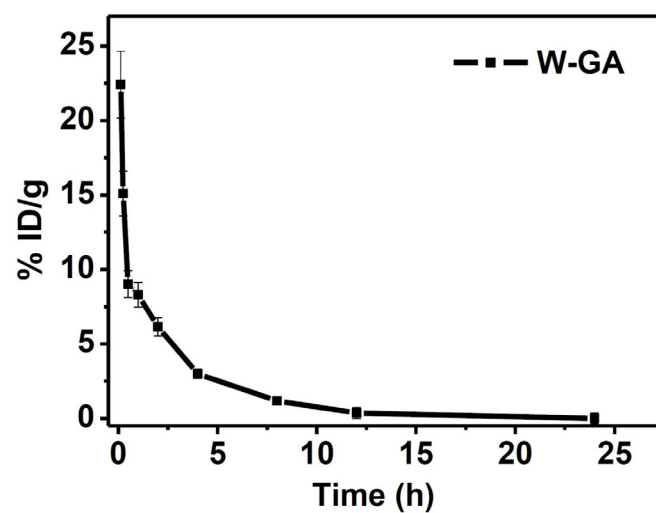

**Supporting Figure S13.** Blood circulation of W-GA-PEG CPNs in mice after *i.v.* injection measured by ICP-AES.

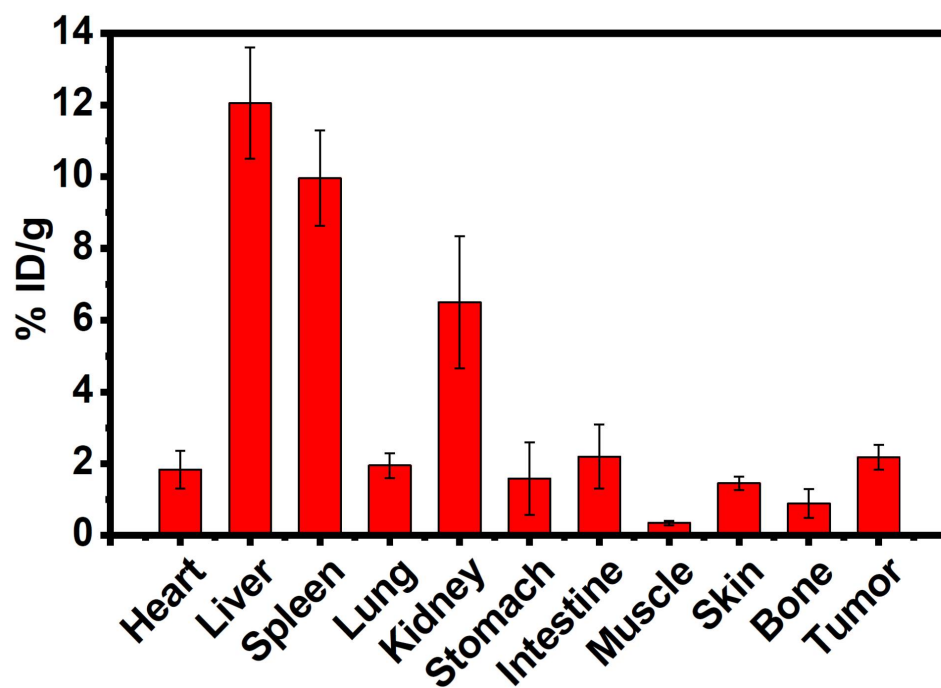

**Supporting Figure S14.** Biodistribution of  $^{64}\text{Cu}$ -W-GA-PEG in various organs and tissues of 4T1 tumor-bearing mice at 24 h *p.i.* as determined by  $^{64}\text{Cu}$  radioactivity measurement by a gamma counter.



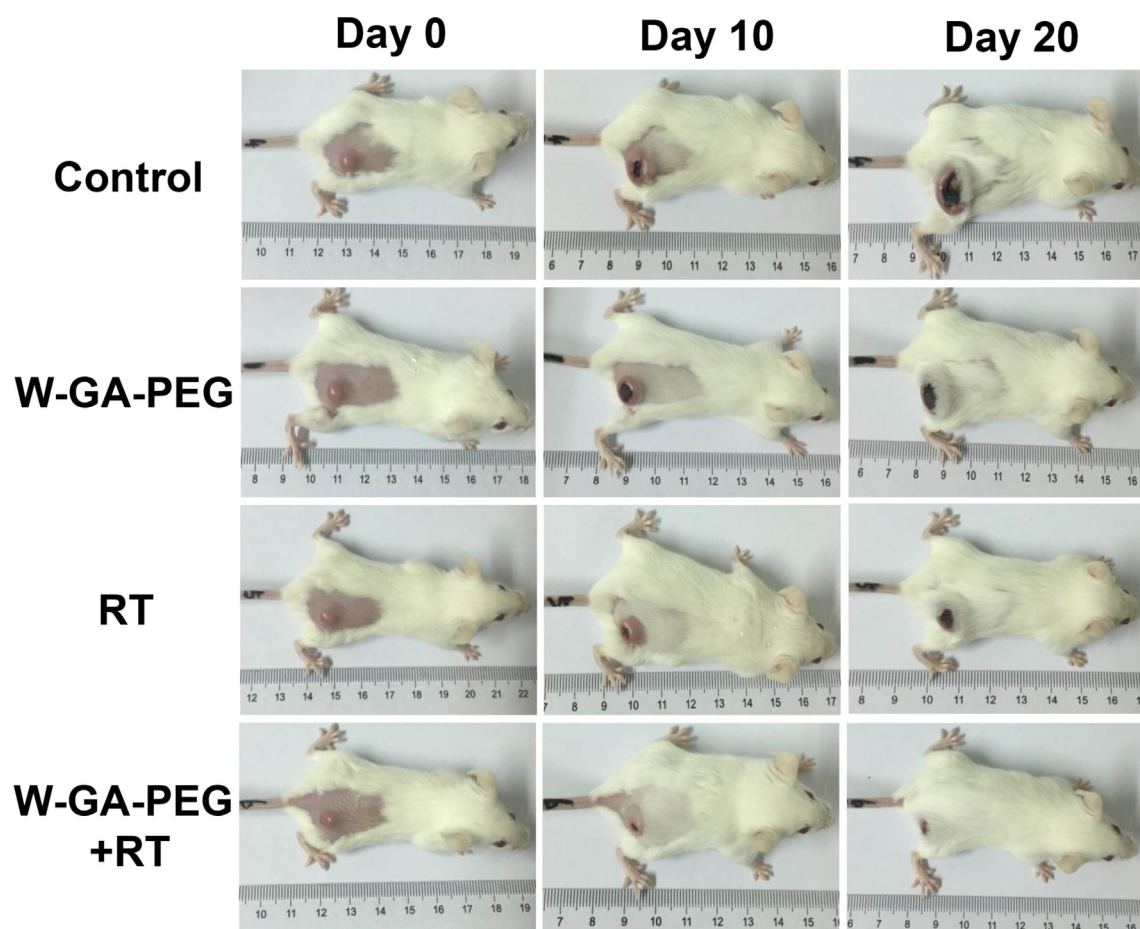

**Supporting Figure S15.** Representative photos of mice from different groups taken at 0, 10 days, and 20 days after various treatments.

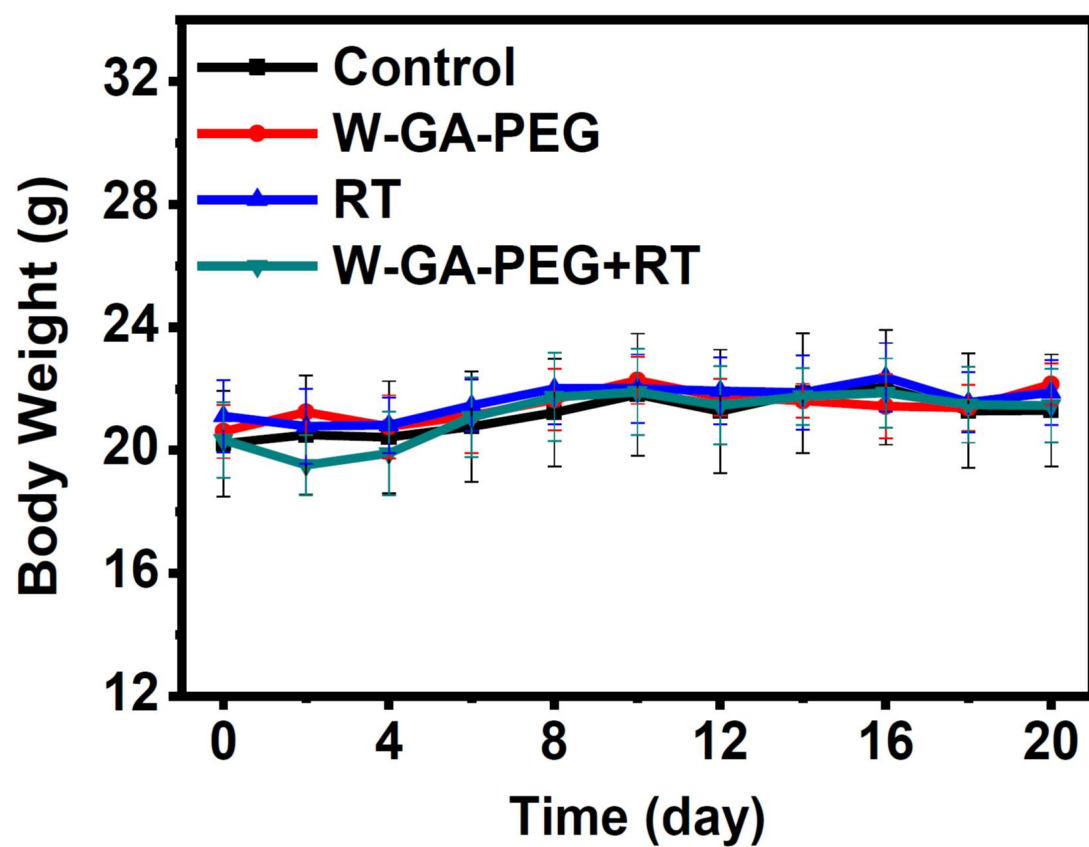

Supporting Figure S16. Body weight of mice after various treatments.



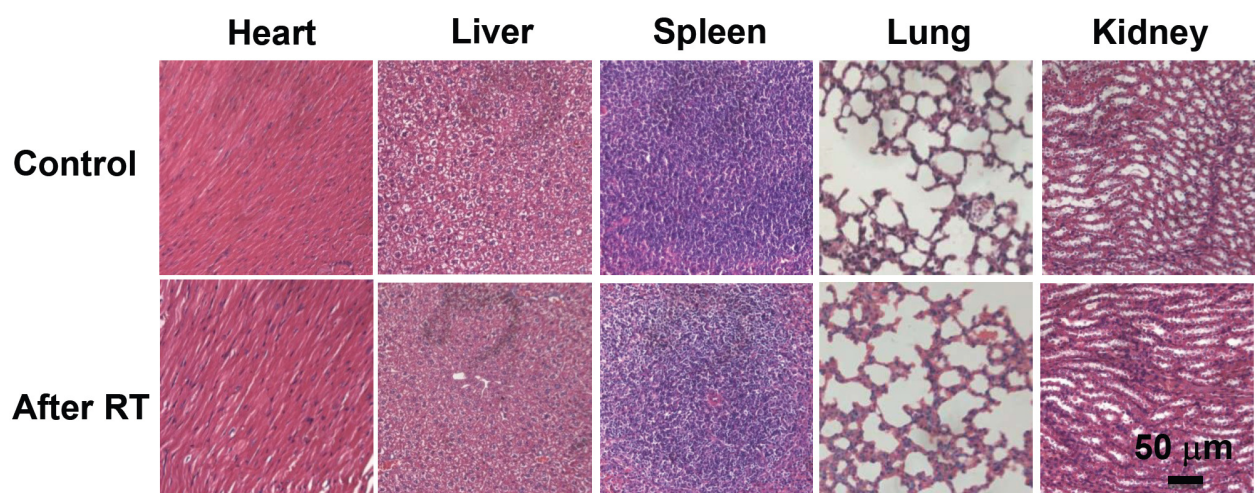

**Supporting Figure S17.** H&E stained slices of major organs of healthy untreated mice and mice 20 days post W-GA-PEG CPNs injection and radiotherapy.

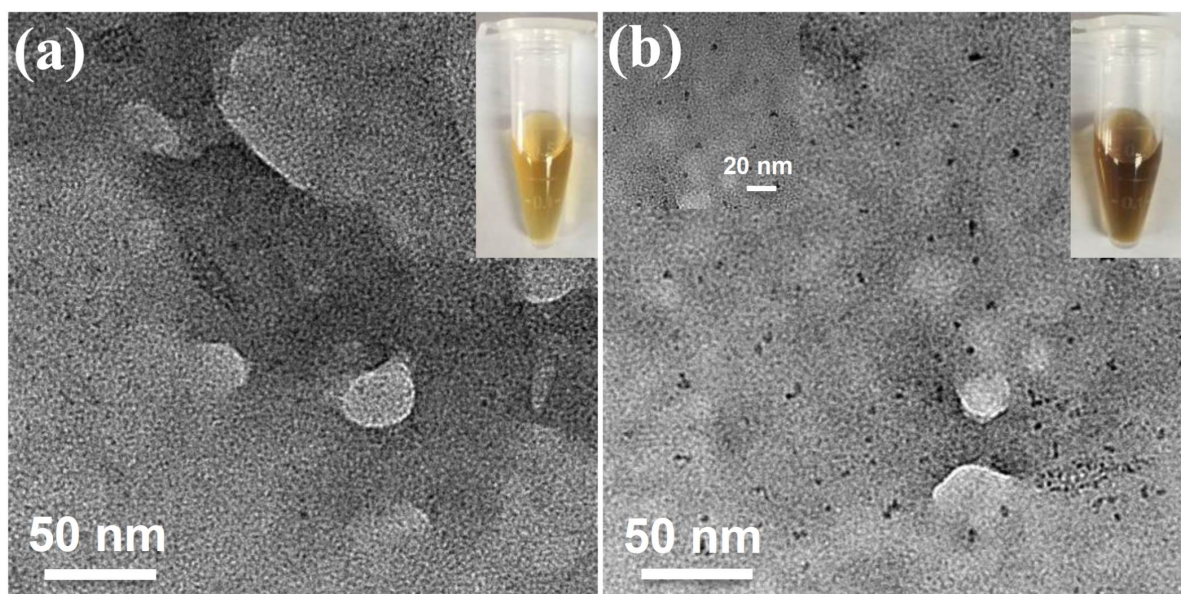

**Supporting Figure S18.** TEM images of urine collected after 24 h from (a) untreated mice and (b) mice injected with W-GA-PEG CPNs. Insert: Photographs of urine collected from different groups.

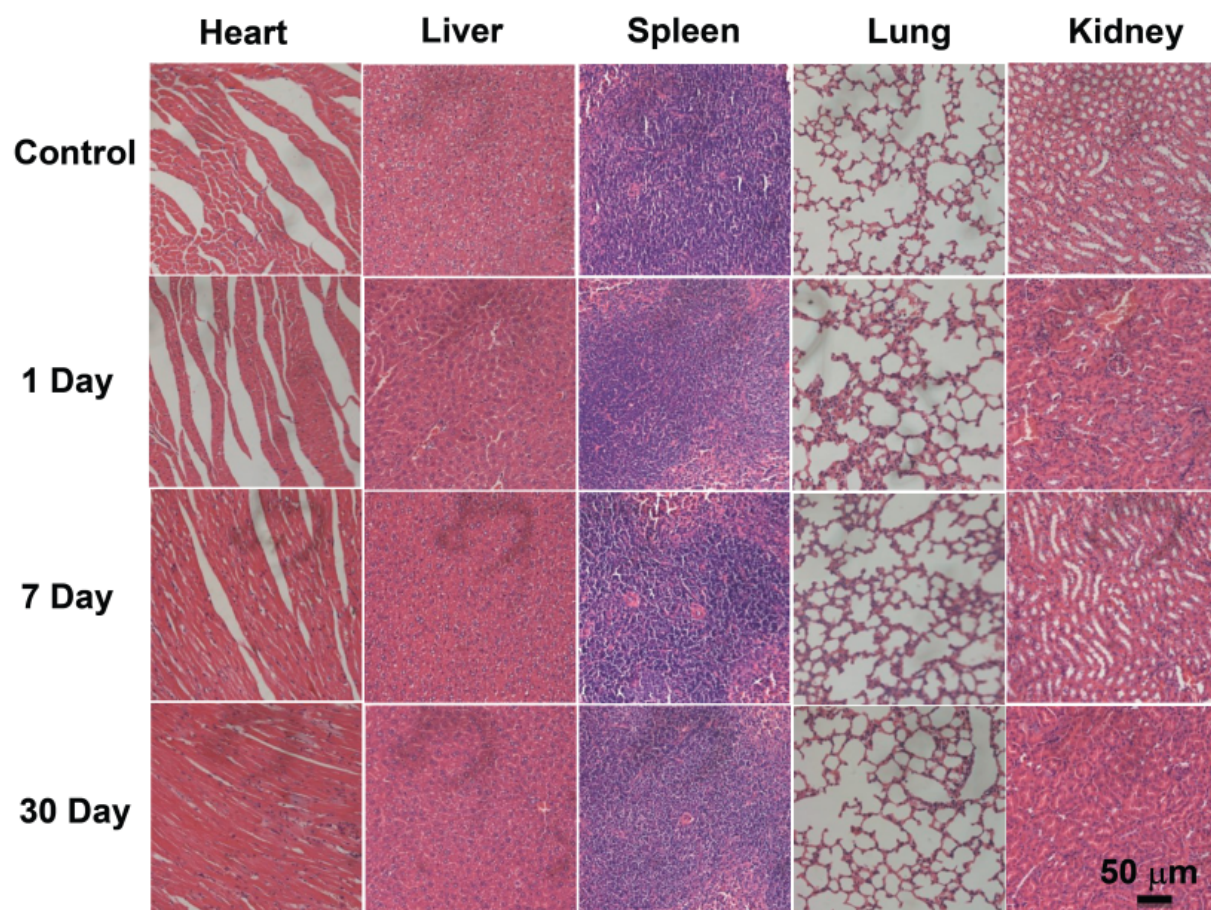

**Supporting Figure S19.** H&E stained slices of major organs of healthy untreated mice and mice at the 1<sup>st</sup> day, 7<sup>th</sup> and 30<sup>th</sup> day post *i.v.* injection of W-GA-PEG CPNs.
